# Supplementary material
Source: PubMed Central journal article supplement (PMC4454371)
Supplement: NIHMS278448-supplement-Note.pdf [file NIHMS278448-supplement-Note.pdf]

**Supplementary Note: Clinical and sample information for the medulloblastoma cohort analyzed by SNP array**  
**Clinical characteristics of 201 medulloblastomas profiled by SNP arrays in the study**

| Sample Designation | Platform | Age | Gender | Histology |
|--------------------|----------|-----|--------|-----------|
| MDT-MB-1           | 100K     | 2.1 | F      | C         |
| MDT-MB-2           | 100K     | 5   | M      | C         |
| MDT-MB-3           | 100K     | 5   | F      | C         |
| MDT-MB-4           | 100K     | 6   | F      | C         |
| MDT-MB-5           | 100K     | 6   | F      | C         |
| MDT-MB-6           | 100K     | 2.3 | F      | D         |
| MDT-MB-7           | 100K     | 7   | M      | C         |
| MDT-MB-8           | 100K     | 10  | M      | LCA       |
| MDT-MB-9           | 100K     | 3   | M      | C         |
| MDT-MB-10          | 100K     | 0.5 | M      | C         |
| MDT-MB-11          | 100K     | 13  | F      | C         |
| MDT-MB-12          | 100K     | 4   | M      | C         |
| MDT-MB-13          | 100K     | 1   | M      | D         |
| MDT-MB-14          | 100K     | 5   | M      | C         |
| MDT-MB-15          | 100K     | 3   | F      | C         |
| MDT-MB-16          | 100K     | 39  | F      | C         |
| MDT-MB-17          | 100K     | 30  | M      | C         |
| MDT-MB-18          | 100K     | 8   | M      | C         |
| MDT-MB-19          | 100K     | 12  | M      | C         |
| MDT-MB-20          | 100K     | 10  | M      | LCA       |
| MDT-MB-21          | 100K     | 5   | M      | C         |
| MDT-MB-22          | 100K     | 1   | F      | D         |
| MDT-MB-23          | 100K     | 4   | M      | C         |
| MDT-MB-24          | 100K     | 7   | F      | C         |
| MDT-MB-25          | 100K     | 17  | M      | C         |
| MDT-MB-26          | 100K     | 4   | F      | C         |
| MDT-MB-27          | 100K     | 2   | F      | D         |
| MDT-MB-28          | 100K     | 10  | M      | C         |
| MDT-MB-29          | 100K     | 12  | M      | C         |
| MDT-MB-30          | 100K     | 7   | M      | LCA       |
| MDT-MB-31          | 100K     | 5   | F      | C         |
| MDT-MB-32          | 100K     | 9   | F      | C         |
| MDT-MB-34          | 100K     | 9   | F      | C         |

---

**Histological Subtypes**

---

**C:** Classic  
**D:** Desmoplastic  
**LCA:** Large cell anaplastic  
**MBEN:** Medulloblastoma with extensive neuronal differentiation  
**N/A:** Not available

---

**Supplementary Note: Clinical and sample information for the medulloblastoma cohort analyzed by SNP array**  
**Clinical characteristics of 201 medulloblastomas profiled by SNP arrays in the study**

| Sample Designation | Platform | Age | Gender | Histology |
|--------------------|----------|-----|--------|-----------|
| MDT-MB-35          | 100K     | 3   | M      | C         |
| MDT-MB-36          | 100K     | 10  | F      | C         |
| MDT-MB-37          | 100K     | 3   | F      | C         |
| MDT-MB-38          | 100K     | 4   | F      | C         |
| MDT-MB-39          | 100K     | 4   | F      | C         |
| MDT-MB-40          | 100K     | 5   | M      | C         |
| MDT-MB-41          | 100K     | 9   | M      | D         |
| MDT-MB-42          | 100K     | 7   | M      | C         |
| MDT-MB-43          | 100K     | 2   | M      | C         |
| MDT-MB-44          | 100K     | 5   | F      | C         |
| MDT-MB-45          | 100K     | 5   | M      | C         |
| MDT-MB-46          | 100K     | 6   | M      | D         |
| MDT-MB-47          | 100K     | 4   | M      | C         |
| MDT-MB-48          | 100K     | 10  | M      | C         |
| MDT-MB-49          | 100K     | 11  | M      | C         |
| MDT-MB-50          | 100K     | 5   | M      | C         |
| MDT-MB-51          | 100K     | 14  | M      | C         |
| MDT-MB-52          | 100K     | 10  | F      | C         |
| MDT-MB-53          | 100K     | 2   | M      | D         |
| MDT-MB-54          | 100K     | 0.8 | F      | C         |
| MDT-MB-55          | 100K     | 5   | M      | C         |
| MDT-MB-56          | 100K     | 3   | M      | C         |
| MDT-MB-57          | 100K     | 6   | M      | C         |
| MDT-MB-58          | 100K     | 3   | M      | MBEN      |
| MDT-MB-59          | 100K     | 10  | M      | C         |
| MDT-MB-60          | 100K     | 11  | M      | D         |
| MDT-MB-61          | 100K     | 5   | M      | C         |
| MDT-MB-62          | 100K     | 12  | M      | C         |
| MDT-MB-63          | 100K     | 5   | F      | C         |
| MDT-MB-64          | 100K     | 23  | F      | C         |
| MDT-MB-65          | 100K     | 7   | F      | C         |
| MDT-MB-66          | 100K     | 5   | M      | LCA       |
| MDT-MB-67          | 100K     | 49  | F      | C         |

**Supplementary Note: Clinical and sample information for the medulloblastoma cohort analyzed by SNP array**  
**Clinical characteristics of 201 medulloblastomas profiled by SNP arrays in the study**

| Sample Designation | Platform | Age | Gender | Histology |
|--------------------|----------|-----|--------|-----------|
| MDT-MB-68          | 100K     | 6   | M      | C         |
| MDT-MB-69          | 100K     | 15  | F      | LCA       |
| MDT-MB-70          | 100K     | 4   | F      | C         |
| MDT-MB-71          | 100K     | 4   | M      | D         |
| MDT-MB-72          | 100K     | 8   | F      | MBEN      |
| MDT-MB-73          | 100K     | 8   | F      | C         |
| MDT-MB-74          | 100K     | 3   | M      | D         |
| MDT-MB-75          | 100K     | 0.6 | M      | D         |
| MDT-MB-76          | 100K     | 6   | M      | D         |
| MDT-MB-77          | 100K     | 13  | F      | C         |
| MDT-MB-78          | 100K     | 6   | M      | LCA       |
| MDT-MB-79          | 100K     | 8   | M      | C         |
| MDT-MB-80          | 100K     | 4   | M      | C         |
| MDT-MB-100         | 500K     | 2.7 | F      | D         |
| MDT-MB-101         | 500K     | 4   | M      | C         |
| MDT-MB-102         | 500K     | 2.1 | M      | LCA       |
| MDT-MB-103         | 500K     | 5   | M      | C         |
| MDT-MB-105         | 500K     | 2   | F      | D         |
| MDT-MB-106         | 500K     | 5   | M      | D         |
| MDT-MB-107         | 500K     | 39  | M      | C         |
| MDT-MB-108         | 500K     | 0.9 | F      | D         |
| MDT-MB-109         | 500K     | 2   | M      | C         |
| MDT-MB-110         | 500K     | 20  | F      | D         |
| MDT-MB-111         | 500K     | 39  | F      | C         |
| MDT-MB-112         | 500K     | 8   | M      | C         |
| MDT-MB-113         | 500K     | 11  | M      | C         |
| MDT-MB-114         | 500K     | 1.8 | F      | LCA       |
| MDT-MB-115         | 500K     | 14  | M      | C         |
| MDT-MB-116         | 500K     | 6   | M      | C         |
| MDT-MB-117         | 500K     | 2   | M      | C         |
| MDT-MB-118         | 500K     | 8   | M      | LCA       |
| MDT-MB-119         | 500K     | 13  | F      | C         |
| MDT-MB-121         | 500K     | 12  | M      | C         |

**Supplementary Note: Clinical and sample information for the medulloblastoma cohort analyzed by SNP array**  
**Clinical characteristics of 201 medulloblastomas profiled by SNP arrays in the study**

| Sample Designation | Platform | Age | Gender | Histology |
|--------------------|----------|-----|--------|-----------|
| MDT-MB-122         | 500K     | 6   | M      | C         |
| MDT-MB-123         | 500K     | 13  | M      | C         |
| MDT-MB-124         | 500K     | 3   | F      | D         |
| MDT-MB-125         | 500K     | 9   | M      | C         |
| MDT-MB-126         | 500K     | 16  | M      | D         |
| MDT-MB-127         | 500K     | 8   | F      | C         |
| MDT-MB-128         | 500K     | 9   | M      | C         |
| MDT-MB-129         | 500K     | 9   | F      | C         |
| MDT-MB-130         | 500K     | 11  | M      | C         |
| MDT-MB-131         | 500K     | 10  | F      | LCA       |
| MDT-MB-132         | 500K     | 7   | F      | C         |
| MDT-MB-133         | 500K     | 14  | M      | C         |
| MDT-MB-134         | 500K     | 5   | M      | C         |
| MDT-MB-135         | 500K     | 10  | M      | C         |
| MDT-MB-136         | 500K     | 1.4 | F      | D         |
| MDT-MB-137         | 500K     | 15  | F      | LCA       |
| MDT-MB-138         | 500K     | 3   | M      | C         |
| MDT-MB-139         | 500K     | 9   | M      | C         |
| MDT-MB-140         | 500K     | 12  | M      | C         |
| MDT-MB-141         | 500K     | 6   | F      | C         |
| MDT-MB-142         | 500K     | 9   | M      | C         |
| MDT-MB-144         | 500K     | 10  | M      | C         |
| MDT-MB-145         | 500K     | 10  | M      | C         |
| MDT-MB-146         | 500K     | 9   | M      | C         |
| MDT-MB-147         | 500K     | 12  | M      | C         |
| MDT-MB-148         | 500K     | 7   | M      | C         |
| MDT-MB-149         | 500K     | 2.8 | M      | C         |
| MDT-MB-150         | 500K     | 4   | M      | C         |
| MDT-MB-151         | 500K     | 3   | M      | D         |
| MDT-MB-152         | 500K     | 2   | M      | C         |
| MDT-MB-153         | 500K     | 15  | M      | C         |
| MDT-MB-154         | 500K     | 8   | F      | LCA       |
| MDT-MB-155         | 500K     | 4   | M      | C         |

**Supplementary Note: Clinical and sample information for the medulloblastoma cohort analyzed by SNP array**  
**Clinical characteristics of 201 medulloblastomas profiled by SNP arrays in the study**

| Sample Designation | Platform | Age | Gender | Histology |
|--------------------|----------|-----|--------|-----------|
| MDT-MB-156         | 500K     | 9   | M      | D         |
| MDT-MB-157         | 500K     | 2   | F      | D         |
| MDT-MB-158         | 500K     | 1   | F      | MBEN      |
| MDT-MB-160         | 500K     | 5   | F      | C         |
| MDT-MB-161         | 500K     | 9   | F      | C         |
| MDT-MB-162         | 500K     | 5   | F      | D         |
| MDT-MB-163         | 500K     | 2   | M      | C         |
| MDT-MB-164         | 500K     | 1.9 | M      | D         |
| MDT-MB-165         | 500K     | 15  | F      | C         |
| MDT-MB-166         | 500K     | 1   | M      | D         |
| MDT-MB-167         | 500K     | 4   | M      | C         |
| MDT-MB-168         | 500K     | 5   | F      | C         |
| MDT-MB-169         | 500K     | 9   | M      | C         |
| MDT-MB-170         | 500K     | 8   | M      | C         |
| MDT-MB-172         | 500K     | 5   | M      | C         |
| MDT-MB-173         | 500K     | 8   | F      | C         |
| MDT-MB-174         | 500K     | 15  | M      | LCA       |
| MDT-MB-175         | 500K     | 7   | M      | D         |
| MDT-MB-176         | 500K     | 4   | M      | C         |
| MDT-MB-177         | 500K     | 10  | M      | LCA       |
| MDT-MB-178         | 500K     | 6   | F      | C         |
| MDT-MB-179         | 500K     | 15  | M      | LCA       |
| MDT-MB-180         | 500K     | 17  | M      | C         |
| MDT-MB-181         | 500K     | 4   | F      | C         |
| MDT-MB-182         | 500K     | 5   | M      | C         |
| MDT-MB-183         | 500K     | 29  | M      | C         |
| MDT-MB-184         | 500K     | 20  | F      | C         |
| MDT-MB-185         | 500K     | 39  | F      | C         |
| MDT-MB-186         | 500K     | 36  | M      | C         |
| MDT-MB-187         | 500K     | 35  | M      | C         |
| MDT-MB-188         | 500K     | 24  | F      | C         |
| MDT-MB-189         | 500K     | 18  | M      | C         |
| MDT-MB-190         | 500K     | 36  | M      | C         |

**Supplementary Note: Clinical and sample information for the medulloblastoma cohort analyzed by SNP array**  
**Clinical characteristics of 201 medulloblastomas profiled by SNP arrays in the study**

| Sample Designation | Platform | Age | Gender | Histology |
|--------------------|----------|-----|--------|-----------|
| MDT-MB-191         | 500K     | 17  | F      | C         |
| MDT-MB-192         | 500K     | 23  | M      | C         |
| MDT-MB-193         | 500K     | 20  | M      | D         |
| MDT-MB-194         | 500K     | 27  | M      | C         |
| MDT-MB-195         | 500K     | 1.9 | F      | C         |
| MDT-MB-196         | 500K     | 5   | M      | C         |
| MDT-MB-197         | 500K     | 7   | M      | LCA       |
| MDT-MB-198         | 500K     | 5   | F      | C         |
| MDT-MB-199         | 500K     | 11  | M      | C         |
| MDT-MB-200         | 500K     | 5   | F      | C         |
| MDT-MB-201         | 500K     | 23  | M      | C         |
| MDT-MB-202         | 500K     | 9   | F      | C         |
| MDT-MB-203         | 500K     | 1.4 | F      | C         |
| MDT-MB-205         | 500K     | 5   | M      | MBEN      |
| MDT-MB-206         | 500K     | 7   | F      | C         |
| MDT-MB-207         | 500K     | 5   | M      | C         |
| MDT-MB-208         | 500K     | 6   | F      | C         |
| MDT-MB-209         | 500K     | 4   | M      | C         |
| MDT-MB-210         | 500K     | 12  | M      | C         |
| MDT-MB-211         | 500K     | 2.7 | M      | C         |
| MDT-MB-212         | 500K     | 10  | F      | C         |
| MDT-MB-213         | 500K     | 2   | M      | D         |
| MDT-MB-214         | 500K     | 4   | M      | MBEN      |
| MDT-MB-215         | 500K     | 21  | M      | D         |
| MDT-MB-216         | 500K     | 11  | M      | LCA       |
| MDT-MB-217         | 500K     | 7   | M      | C         |
| MDT-MB-219         | 500K     | 6   | M      | LCA       |
| MDT-MB-220         | 500K     | 5   | F      | C         |
| MDT-MB-221         | 500K     | 9   | F      | C         |
| MDT-MB-222         | 500K     | 6   | M      | C         |
| MDT-MB-223         | 500K     | 10  | F      | C         |
| MDT-MB-224         | 500K     | 15  | M      | LCA       |
| MDT-MB-225         | 500K     | 1   | M      | D         |

**Supplementary Note: Clinical and sample information for the medulloblastoma cohort analyzed by SNP array**  
**Clinical characteristics of 201 medulloblastomas profiled by SNP arrays in the study**

| <b>Sample Designation</b> | <b>Platform</b> | <b>Age</b> | <b>Gender</b> | <b>Histology</b> |
|---------------------------|-----------------|------------|---------------|------------------|
| MDT-MB-226                | 500K            | 1          | M             | D                |
| MDT-MB-228                | 500K            | N/A        | M             | N/A              |
| MDT-MB-229                | 500K            | N/A        | M             | N/A              |

## Technical performance data for Affymetrix SNP arrays

| Platform | # Samples | # MB Cell Lines | # Primary MBs | Male* | Female* | Mean SNP Call | Median SNP Call Rate | Call Rate-Range |
|----------|-----------|-----------------|---------------|-------|---------|---------------|----------------------|-----------------|
|          |           |                 |               |       |         | Rate-BRLMM    | BRLMM                |                 |
| 50K Hind | 89        | 10              | 79            | 48    | 31      | 98.81         | 99.15                | 93.66-99.84     |
| 50K Xba  | 89        | 10              | 79            | 48    | 31      | 98.92         | 99.26                | 93.56-99.90     |
| 250K Nsp | 123       | 1               | 122           | 81    | 41      | 98.39         | 98.75                | 93.94-99.77     |
| 250K Sty | 123       | 1               | 122           | 81    | 41      | 98.45         | 98.7                 | 92.85-99.80     |

|               |     |    |     |     |    |  |  |  |
|---------------|-----|----|-----|-----|----|--|--|--|
| <b>Total:</b> | 212 | 11 | 201 | 129 | 72 |  |  |  |
|---------------|-----|----|-----|-----|----|--|--|--|

| MB Subtypes:       | # of Samples | %    |
|--------------------|--------------|------|
| Classic            | 143          | 71.1 |
| Desmoplastic       | 32           | 15.9 |
| Large cell anaplas | 19           | 9.5  |
| MBEN               | 5            | 2.5  |
| Not Available      | 2            | 1.0  |
